# Supplementary material
Source: PubMed Central journal article supplement (PMC5543719)
Supplement: NIHMS872134-supplement-2.pdf [file NIHMS872134-supplement-2.pdf]

## Guidelines for reporting clinical outcome studies in Radiotherapy and Oncology

These guidelines meet the minimum criteria defined in the CONSORT statement for reporting of randomized clinical trials [13] with added radiotherapy items in bold type face.

Authors submitting reports on clinical outcome studies should include a filled-in copy of this form when submitting their manuscript. For a discussion of the items in this form see the review by Bentzen (Radiotherapy and Oncology 46, 5–18, 1998).

| Heading      | Subheading                 | Item                                                                                                                                                         | Was it reported<br>Yes/No/NA* | If Yes, on what<br>page No.? |
|--------------|----------------------------|--------------------------------------------------------------------------------------------------------------------------------------------------------------|-------------------------------|------------------------------|
| Title        |                            | 1. Identify the study as a randomized trial                                                                                                                  | _____                         | _____                        |
| Introduction |                            | 2. State the prospectively defined hypothesis, clinical objectives and planned subgroup or covariate analyses                                                | _____                         | _____                        |
| Methods      | Study design               | 3. Define the patient population, inclusion and exclusion criteria                                                                                           | _____                         | _____                        |
|              | Radiotherapy               | 4. Planned treatments and their timing                                                                                                                       | _____                         | _____                        |
|              |                            | <b>5. Radiotherapy dose prescription method, dose-planning Procedure</b>                                                                                     | _____                         | _____                        |
|              |                            | <b>6. Target volume definition, critical organs considered, simulation and verification procedures</b>                                                       | _____                         | _____                        |
|              |                            | <b>7. Dose fractionation details</b>                                                                                                                         | _____                         | _____                        |
|              |                            | <b>8. Planned RT quality assurance procedures</b>                                                                                                            | _____                         | _____                        |
|              | Endpoints and analysis     | 9. Primary and secondary endpoints, specific follow-up procedures, the minimum clinically relevant difference, the target sample size and how it was decided | _____                         | _____                        |
|              |                            | 10. Statistical analyses, their purpose and methods used, and whether the intention-to-treat principle was used                                              | _____                         | _____                        |
|              |                            | 11. Trial monitoring, early stopping rules                                                                                                                   | _____                         | _____                        |
|              | Randomization              | 12. Method used for randomization                                                                                                                            | _____                         | _____                        |
|              |                            | 13. Method of concealment and time of randomization                                                                                                          | _____                         | _____                        |
|              |                            | 14. Method to separate the generator of random treatment assignment from the treating physician                                                              | _____                         | _____                        |
| Results      | Masking                    | 15. Describe any blinding procedures (if relevant)                                                                                                           | _____                         | _____                        |
|              | Patient flow and follow-up | 16. Provide an overview of number of patients randomized, compliance with treatment, RT quality assurance results                                            | _____                         | _____                        |
|              | Analysis                   | 17. State the effect of treatment on primary and secondary tumor outcome measures, including effect estimates with confidence intervals                      | _____                         | _____                        |
|              |                            | <b>18. Describe the incidence and grade of treatment-induced early and late toxicity by treatment group</b>                                                  | _____                         | _____                        |
|              |                            | 19. State frequencies as absolute numbers when feasible (e.g. 10/20 and not just 50%)                                                                        | _____                         | _____                        |
|              |                            | 20. Present summary data with appropriate statistics to permit alternative analyses or interpretations and comparisons with other trials on the same problem | _____                         | _____                        |
|              |                            | 21. Describe prognostic variables by treatment group, check if they were balanced, and if not describe attempts to adjust for them                           | _____                         | _____                        |
|              |                            | 22. Describe protocol deviations from the study as planned, together with reasons                                                                            | _____                         | _____                        |
| Discussion   |                            | 23. State the interpretation of the study findings, including sources of bias and imprecision, discuss how this trial compares with other similar studies    | _____                         | _____                        |
| Conclusion   |                            | 24. State the general interpretation of the trial in view of all available evidence in the literature                                                        | _____                         | _____                        |

\* NA, not applicable, certain items apply to randomized studies only.
